# Supplementary material for: Pseudogene Transcripts in Head and Neck Cancer: Literature Review and In Silico Analysis
Source: MDPI journal article supplement (doi:10.3390/genes12081254), 2021-08-17
Supplement: s1 [file s1]

## Supplementary Information

# Pseudogene Transcripts in Head and Neck Cancer: Literature Review and *In Silico* Analysis

Juliana Carron <sup>1</sup>, Rafael Della Coletta <sup>2</sup> and Gustavo Jacob Lourenço <sup>1,\*</sup>

<sup>1</sup> Laboratory of Cancer Genetics, School of Medical Sciences, University of Campinas, Campinas, SP, 13083-888, Brazil; julianacarron@outlook.com.br

<sup>2</sup> Department of Agronomy and Plant Genetics, University of Minnesota, Saint Paul, MN 55108, USA; della028@umn.edu

\* Correspondence: guslour@unicamp.br, Tel.: +55-19-3521-9120

**Table S1.** Clinicopathological aspects of 219 head and neck cancer patients selected at The Cancer Genome Atlas database.

| Characteristics    | Number of Patients<br>(Range or %) |
|--------------------|------------------------------------|
| Median age (years) | 60 (38-89)                         |
| Gender             |                                    |
| Male               | 174 (79.5)                         |
| Female             | 45 (20.5)                          |
| Ethnic origin      |                                    |
| White              | 183 (83.6)                         |
| Non-white          | 30 (13.7)                          |
| Not reported       | 6 (2.7)                            |
| Tumor localization |                                    |
| Oral cavity        | 62 (28.3)                          |
| Oropharynx         | 51 (23.3)                          |
| Hypopharynx        | 8 (3.7)                            |
| Larynx             | 98 (44.7)                          |
| Vital status       |                                    |
| Alive              | 130 (59.4)                         |
| Dead               | 89 (40.6)                          |

**Citation:** Carron, J.; Della Coletta, R.; Lourenço, G.J. Pseudogene Transcripts in Head and Neck Cancer: Literature Review and *In Silico* Analysis. *Genes* **2021**, *12*, 1254. <https://doi.org/10.3390/genes12081254>

Academic Editor: Deborah J. Good

Received: 29 June 2021

Accepted: 12 August 2021

Published: 17 August 2021

**Publisher's Note:** MDPI stays neutral with regard to jurisdictional claims in published maps and institutional affiliations.

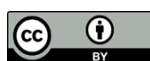

**Copyright:** © 2021 by the authors. Submitted for possible open access publication under the terms and conditions of the Creative Commons Attribution (CC BY) license (<http://creativecommons.org/licenses/by/4.0/>).

**Table S2.** Most deregulated pseudogenes in head and neck cancer and its subtypes identified at The Cancer Genome Atlas database, genetic variation type and identifier.

| Pseudogene Transcript | Genetic Variation Type (n) | Genetic Variation Identifier (ID)                                                                                                                                                                                                                                                                                                                                                                             |
|-----------------------|----------------------------|---------------------------------------------------------------------------------------------------------------------------------------------------------------------------------------------------------------------------------------------------------------------------------------------------------------------------------------------------------------------------------------------------------------|
| <i>SPATA31D5P</i>     | SNV (19)                   | chr9:g.81917110T>C; chr9:g.81916294C>T; chr9:g.81916788C>G; chr9:g.81915701G>A; chr9:g.81916112A>T; chr9:g.81917939C>T; chr9:g.81917426G>T; chr9:g.81918866C>T; chr9:g.81916813G>C; chr9:g.81917603C>T; chr9:g.81917898C>T; chr9:g.81916693T>C; chr9:g.81916906G>A; chr9:g.81915617C>T; chr9:g.81915633G>A; chr9:g.81917204T>A; chr9:g.81919502C>A; chr9:g.81917927C>A; chr9:g.81916688C>A                    |
| <i>HERC2P3</i>        | SNV (19)                   | chr15:g.20383438A>T; chr15:g.20439375G>T; chr15:g.20452449G>T; chr15:g.20452462G>A; chr15:g.20452555G>A; chr15:g.20438651T>C; chr15:g.20383431C>T; chr15:g.20453853C>A; chr15:g.20440493G>A; chr15:g.20438683G>A; chr15:g.20452505C>A; chr15:g.20439040C>A; chr15:g.20438824T>G; chr15:g.20453634C>T; chr15:g.20383366C>T; chr15:g.20444372C>T; chr15:g.20444256G>T; chr15:g.20444227C>A; chr15:g.20444371C>T |
| <i>SPATA31C2</i>      | SNV (15)                   | chr9:g.88132450G>T; chr9:g.88131173G>T; chr9:g.88134788G>A; chr9:g.88131242A>C; chr9:g.88131995T>G; chr9:g.88131928G>T; chr9:g.88132087G>T; chr9:g.88131854G>C; chr9:g.88131333C>G; chr9:g.88132406G>A; chr9:g.88132101C>T; chr9:g.88132278C>A; chr9:g.88131939A>C; chr9:g.88132182G>T; chr9:g.88129720C>T                                                                                                    |
| <i>MAGEB6P1</i>       | SNV (15)                   | chrX:g.26160667C>G; chrX:g.26161441G>A; chrX:g.26160625C>A; chrX:g.26161623C>T; chrX:g.26161408C>A; chrX:g.26161374C>G; chrX:g.26160629G>C; chrX:g.26161687G>T; chrX:g.26161039G>T; chrX:g.26161010G>T; chrX:g.26161091C>G; chrX:g.26161454C>G; chrX:g.26160651G>A; chrX:g.26161152T>A; chrX:g.26161707G>C                                                                                                    |
| <i>SLC25A51P1</i>     | SNV (13)                   | chr6:g.65788530C>T; chr6:g.65788587A>G; chr6:g.65789220G>T; chr6:g.65788451C>G; chr6:g.65788893C>A; chr6:g.65788561C>T; chr6:g.65788602C>T; chr6:g.65788894T>G; chr6:g.65788704T>A; chr6:g.65789088G>T; chr6:g.65788563C>A; chr6:g.65789247C>A; chr6:g.65788770A>T                                                                                                                                            |
| <i>BAGE2</i>          | SNV (12)                   | chr21:g.10413565C>A; chr21:g.10473718C>A; chr21:g.10473325G>T; chr21:g.10473449T>C; chr21:g.10473596C>A; chr21:g.10413636G>A; chr21:g.10473632G>A; chr21:g.10413730G>T; chr21:g.10473316C>A; chr21:g.10473241C>A; chr21:g.10413587G>T; chr21:g.10454138G>A                                                                                                                                                    |
| <i>DNM1P47</i>        | SNV (8)                    | chr15:g.101759775G>T; chr15:g.101762730C>T; chr15:g.101752519C>G; chr15:g.101759755C>G; chr15:g.101764268G>A; chr15:g.101753184G>T; chr15:g.101759784C>A; chr15:g.101752987G>C                                                                                                                                                                                                                                |
| <i>SPATA31C1</i>      | SNV (13) and del (1)       | chr9:g.87922410C>T; chr9:g.87920997C>G; chr9:g.87919151T>A; chr9:g.87920595C>A; chr9:g.87921094C>T; chr9:g.87922031G>T; chr9:g.87920433G>A; chr9:g.87922796G>T; chr9:g.87921535G>T; chr9:g.87920604C>A; chr9:g.87920350G>A; chr9:g.87922158C>A; chr9:g.87921534G>T; chr9:g.87921488delG                                                                                                                       |
| <i>ZNF733P</i>        | SNV (10)                   | chr7:g.63292321G>T; chr7:g.63292374T>A; chr7:g.63292245G>A; chr7:g.63292191C>A; chr7:g.63292378C>T; chr7:g.63291761C>A; chr7:g.63292237G>A; chr7:g.63292132G>T; chr7:g.63292812G>T; chr7:g.63291599C>A                                                                                                                                                                                                        |
| <i>OR2W5</i>          | SNV (10) and del (1)       | chr1:g.247491764C>T; chr1:g.247491713G>T; chr1:g.247491194C>A; chr1:g.247491778C>T; chr1:g.247491919A>G; chr1:g.247491820C>A; chr1:g.247491316T>G; chr1:g.247492077G>A; chr1:g.247491717C>A; chr1:g.247491708T>C; chr1:g.247491293delCA                                                                                                                                                                       |
| <i>NBPF25P</i>        | SNV (7)                    | chr1:g.145578886T>C; chr1:g.145578049G>A; chr1:g.145586293C>G; chr1:g.145587982G>A; chr1:g.145587966C>A; chr1:g.145580723C>T; chr1:g.145574113G>C                                                                                                                                                                                                                                                             |
| <i>NXF4</i>           | SNV (7)                    | chrX:g.102550109G>C; chrX:g.102562668C>T; chrX:g.102563371G>T; chrX:g.102564000G>A; chrX:g.102550112G>A; chrX:g.102567021C>T; chrX:g.102568467G>T                                                                                                                                                                                                                                                             |
| <i>BNIP3P1</i>        | SNV (7)                    | chr14:g.28264892C>G; chr14:g.28265090G>T; chr14:g.28264729C>T; chr14:g.28264677G>C; chr14:g.28264503C>T; chr14:g.28264837C>A; chr14:g.28264618A>G                                                                                                                                                                                                                                                             |
| <i>PKD1L2</i>         | SNV (2)                    | chr16:g.81174810G>T; chr16:g.81175654G>C                                                                                                                                                                                                                                                                                                                                                                      |
| <i>ZNF658B</i>        | SNV (7)                    | chr9:g.39445654G>A; chr9:g.39446976C>A; chr9:g.39445373G>A; chr9:g.39447267G>A; chr9:g.39446313G>A; chr9:g.39445270C>A; chr9:g.39445269A>C                                                                                                                                                                                                                                                                    |
| <i>POTEA</i>          | SNV (6)                    | chr8:g.43292781G>T; chr8:g.43292519C>T; chr8:g.43318555C>G; chr8:g.43318595C>T; chr8:g.43318569C>T; chr8:g.43318547G>C                                                                                                                                                                                                                                                                                        |

|                  |                        |                                                                                                                                                                                      |
|------------------|------------------------|--------------------------------------------------------------------------------------------------------------------------------------------------------------------------------------|
| <i>MROH5</i>     | SNV (8)                | chr8:g.141507213G>A; chr8:g.141490163G>A; chr8:g.141435999C>G;<br>chr8:g.141476053C>G; chr8:g.141496335C>T; chr8:g.141472881A>T;<br>chr8:g.141440315C>T; chr8:g.141435204G>A         |
| <i>MSL3P1</i>    | SNV (2)                | chr2:g.233867311G>C; chr2:g.233867189C>G                                                                                                                                             |
| <i>HLA-H</i>     | SNV (2)                | chr6:g.29888008G>C; chr6:g.29889597G>C                                                                                                                                               |
| <i>TUBB8P7</i>   | SNV (5)                | chr16:g.90095366G>T; chr16:g.90095367C>T; chr16:g.90094640G>A;<br>chr16:g.90095655C>T; chr16:g.90095622G>A                                                                           |
| <i>SLC7A5P2</i>  | SNV (2)                | chr16:g.21519961G>A; chr16:g.21519895G>C                                                                                                                                             |
| <i>DPY19L2P1</i> | SNV (5)                | chr7:g.35090359T>C; chr7:g.35104687G>A; chr7:g.35104704C>T; chr7:g.35090332A>T;<br>chr7:g.35090346T>C                                                                                |
| <i>TSSC2</i>     | SNV (3)                | chr11:g.3407576G>A; chr11:g.3401855C>T; chr11:g.3401768C>G                                                                                                                           |
| <i>DPY19L2P3</i> | SNV (5)                | chr7:g.29694607C>A; chr7:g.29687396G>A; chr7:g.29697009T>G; chr7:g.29733553G>A;<br>chr7:g.29742234T>A                                                                                |
| <i>GBA3</i>      | SNV (8)                | chr4:g.22736146G>T; chr4:g.22747855A>G; chr4:g.22747913G>A; chr4:g.22727581A>T;<br>chr4:g.22747778C>A; chr4:g.22693025C>A; chr4:g.22748026T>A; chr4:g.22818740C>G                    |
| <i>PLEKHM1P</i>  | SNV (4)                | chr17:g.64800344T>C; chr17:g.64800567G>A; chr17:g.64797321G>A; chr17:g.64792411C>T                                                                                                   |
| <i>MST1P2</i>    | SNV (4)                | chr1:g.16643086C>T; chr1:g.16649682G>C; chr1:g.16646409C>A; chr1:g.16649657G>C                                                                                                       |
| <i>ADAM21P1</i>  | SNV (1) and ins<br>(1) | chr14:g.70246544C>G; chr14:g.70247179_70247180insT                                                                                                                                   |
| <i>OR12D2</i>    | SNV (6)                | chr6:g.29397288C>A; chr6:g.29397420G>T; chr6:g.29396714C>G; chr6:g.29397313C>G;<br>chr6:g.29396774C>T; chr6:g.29397334C>T;                                                           |
| <i>PNLIPRP2</i>  | SNV (8)                | chr10:g.116626969G>C; chr10:g.116626952T>A; chr10:g.116626910G>A;<br>chr10:g.116626924G>T; chr10:g.116634889A>T; chr10:g.116636825T>C;<br>chr10:g.116623984A>T; chr10:g.116636905A>G |
| <i>HSP90AB2P</i> | SNV (5)                | chr4:g.13337246G>A; chr4:g.13336782A>G; chr4:g.13336798C>A; chr4:g.13338268G>A;<br>chr4:g.13337610G>A                                                                                |

number of genetic variations, SNV: single nucleotide variation, del: deletion, ins: insertion.
